# Supplementary material
Source: PubMed Central journal article supplement (PMC5525147)

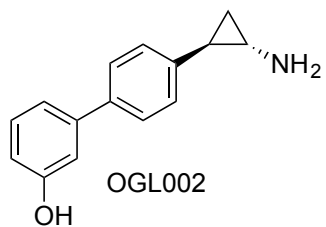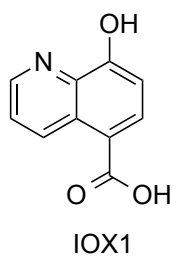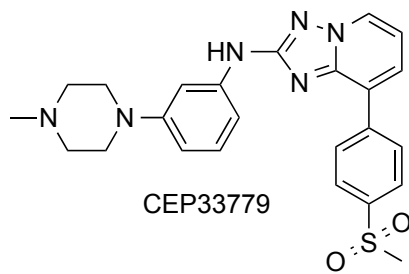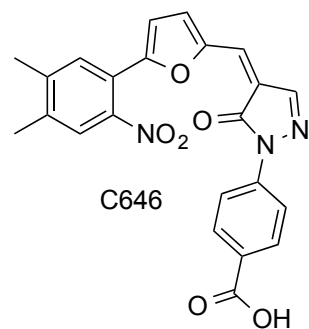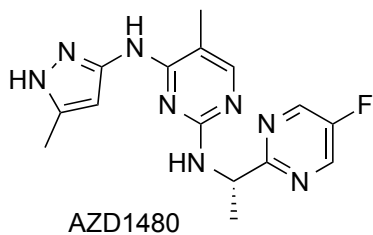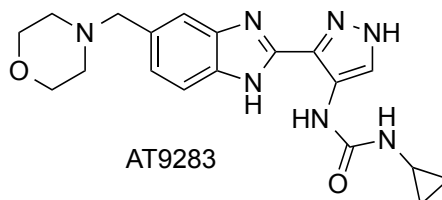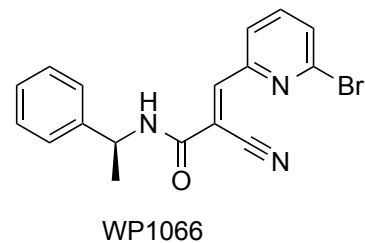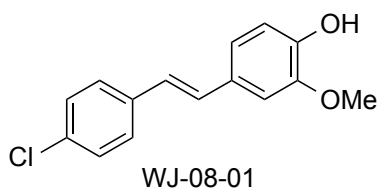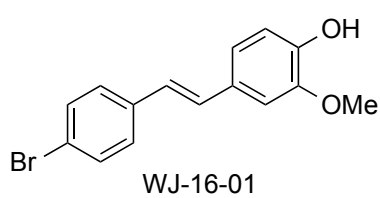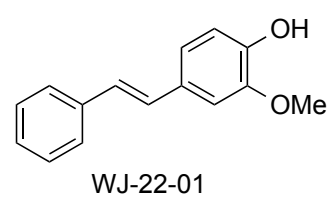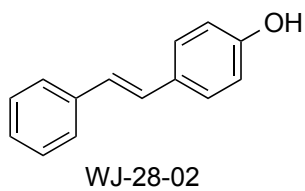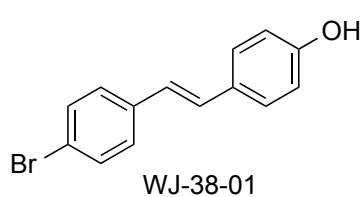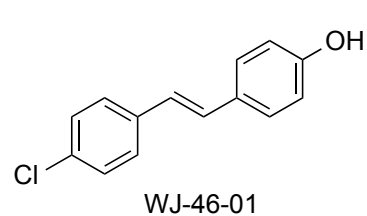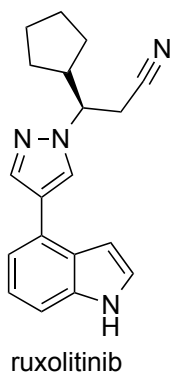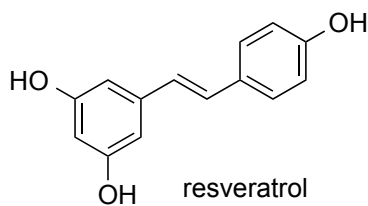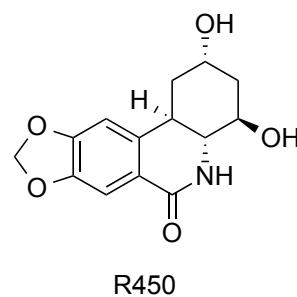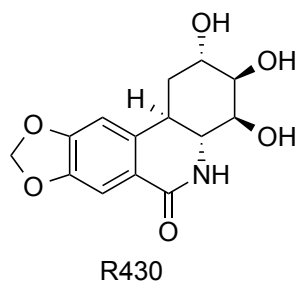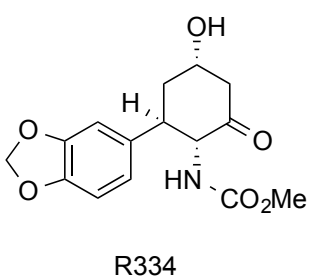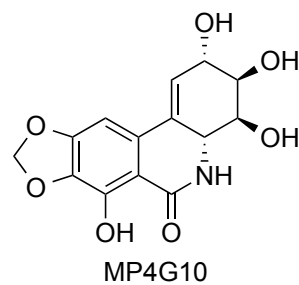

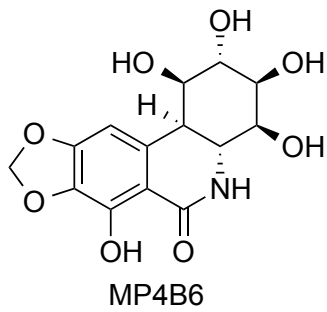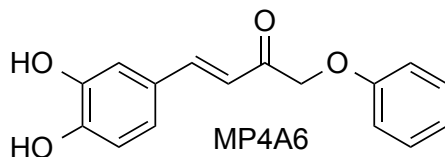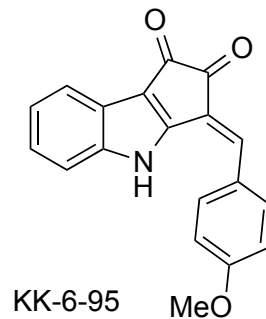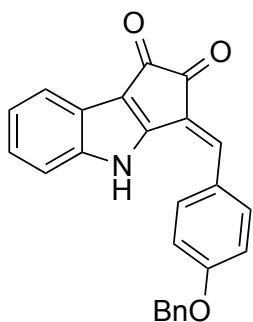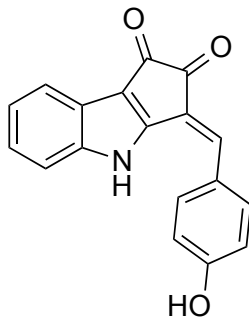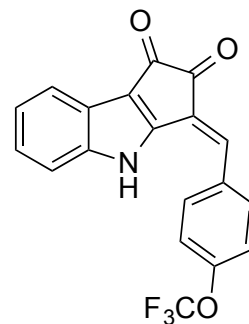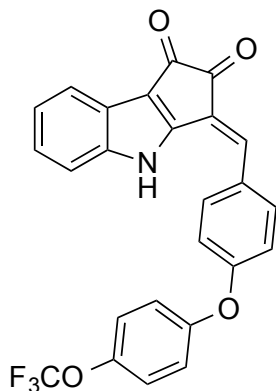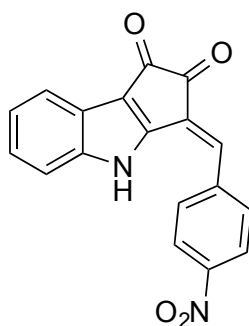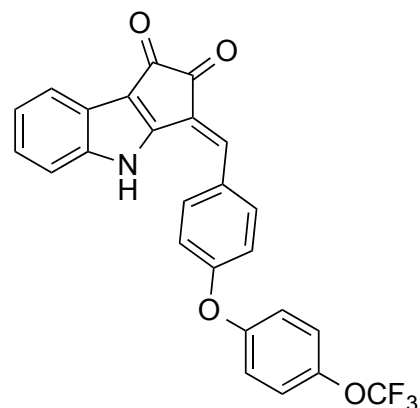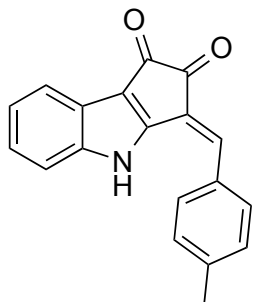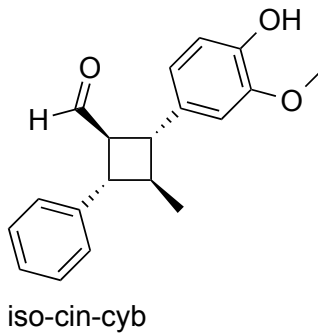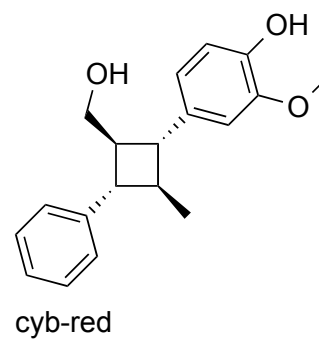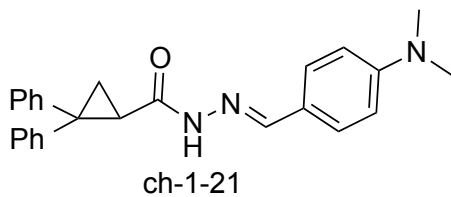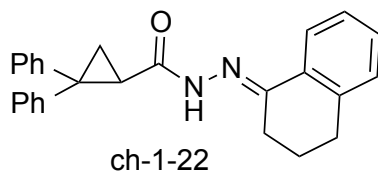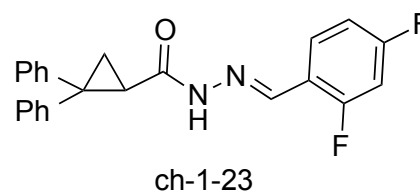

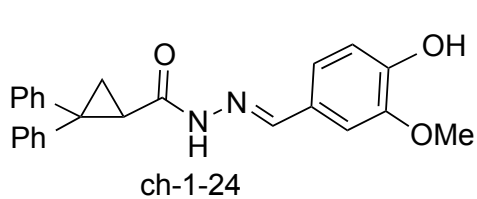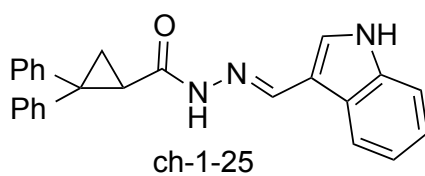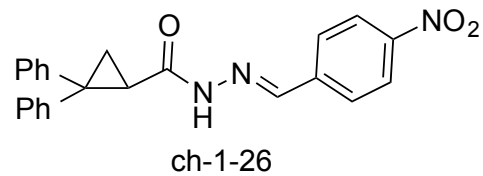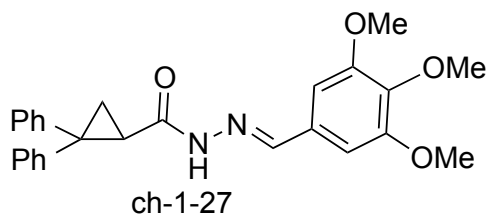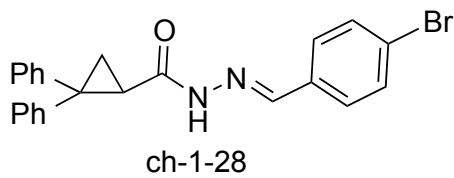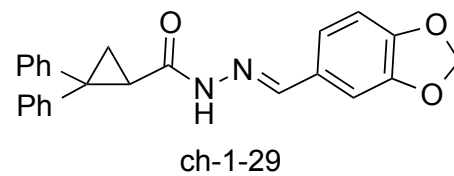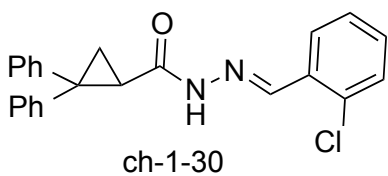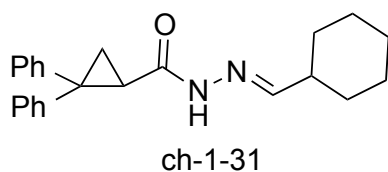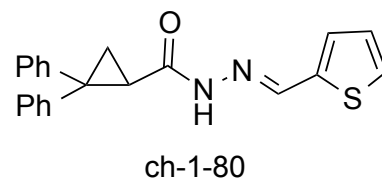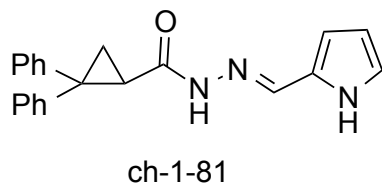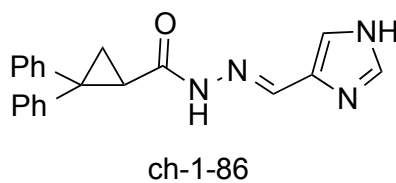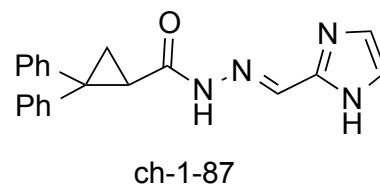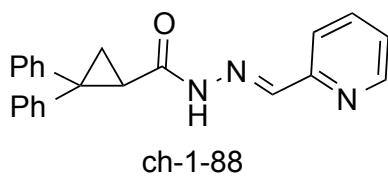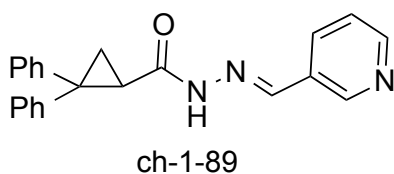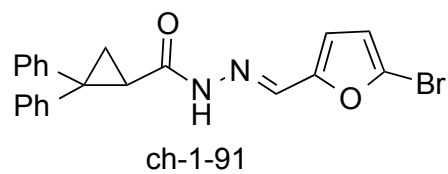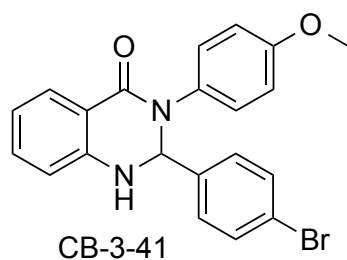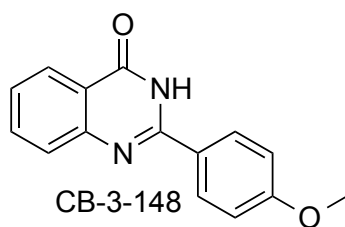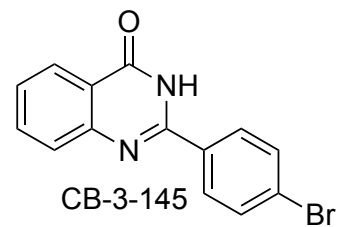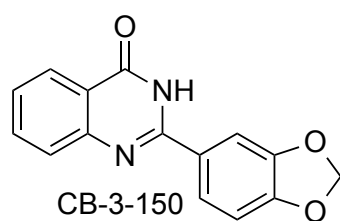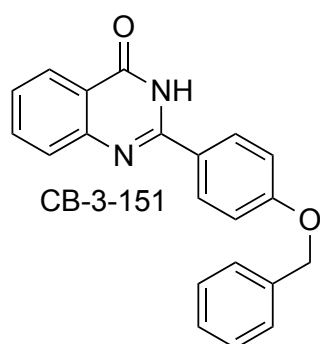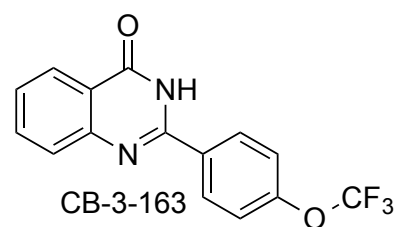

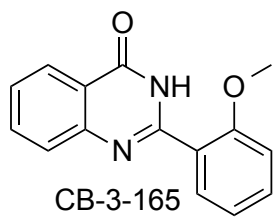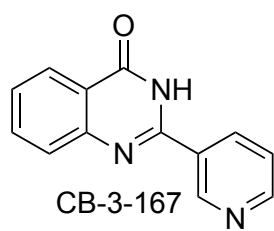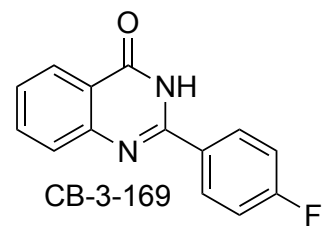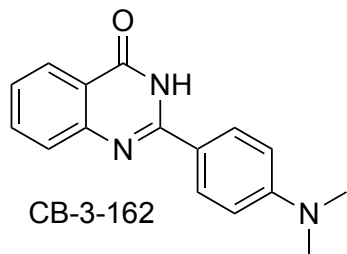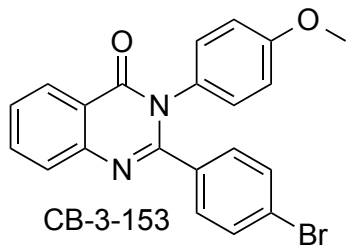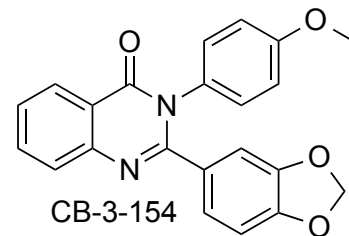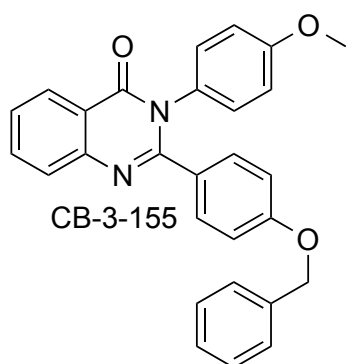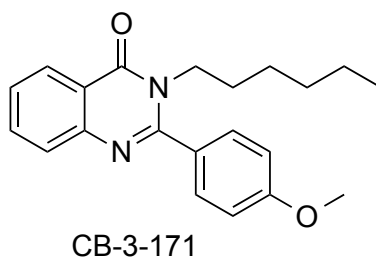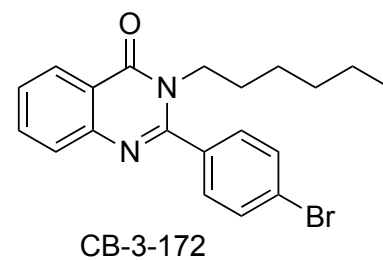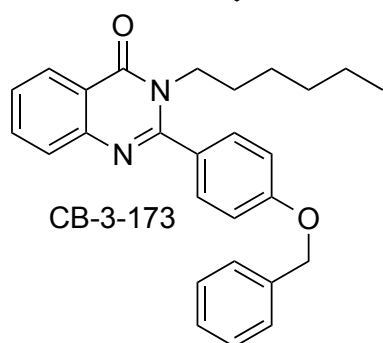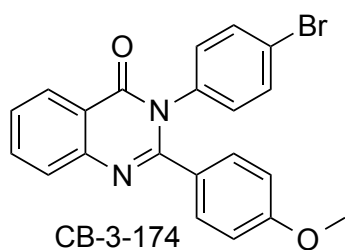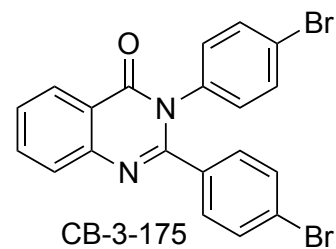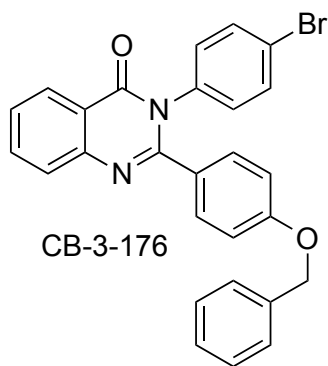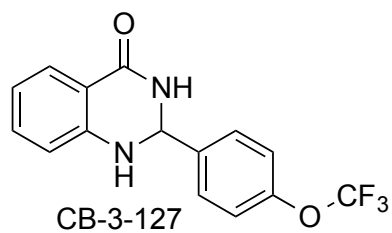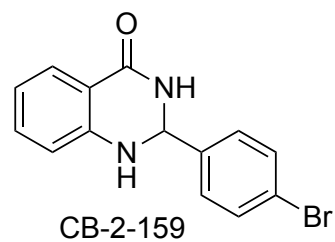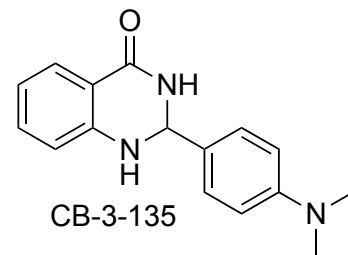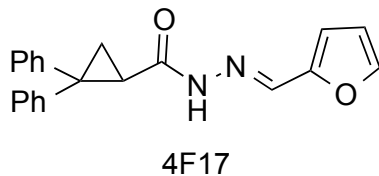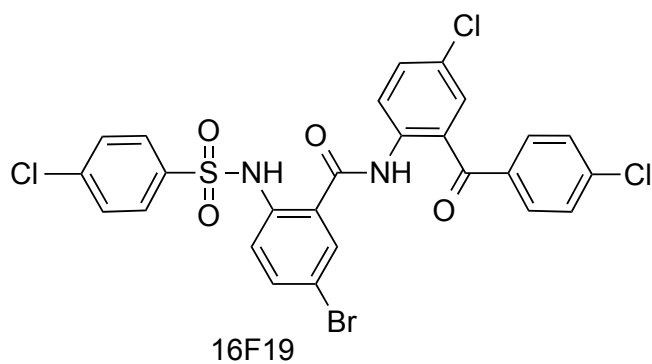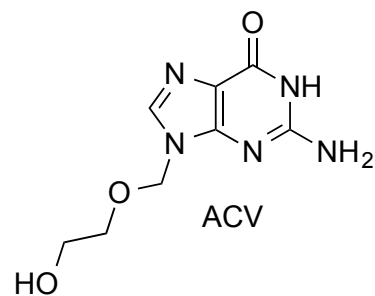

Supplement: NIHMS864462-supplement-1.pdf [file NIHMS864462-supplement-1.pdf]

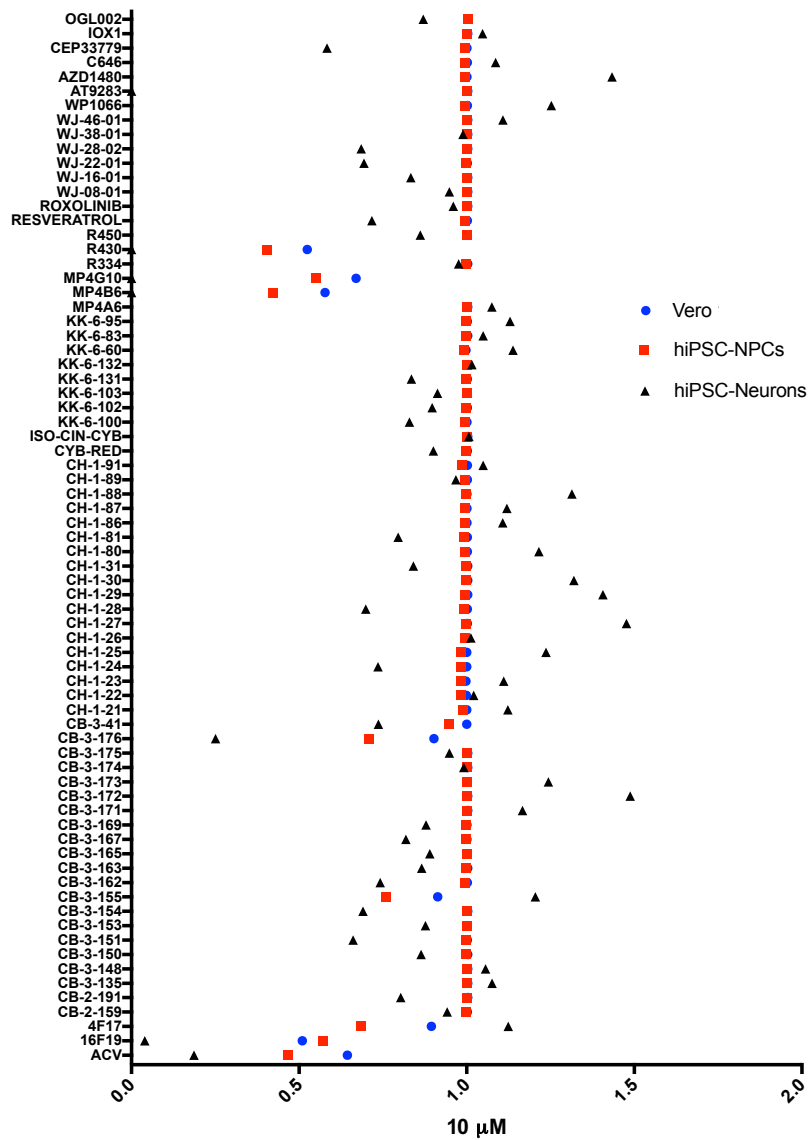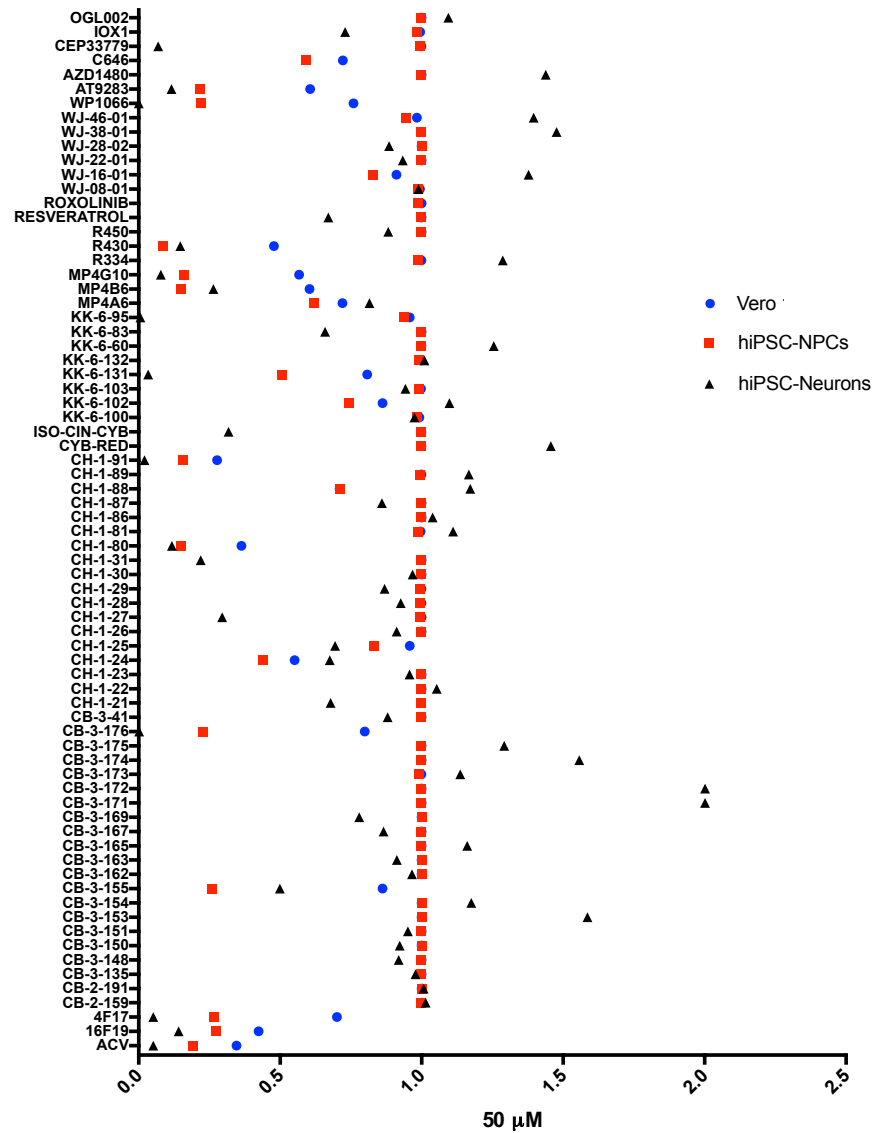

Supplement: NIHMS864462-supplement-2.pdf [file NIHMS864462-supplement-2.pdf]
